# Supplementary material for: A decellularized scaffold derived from squid cranial cartilage for use in cartilage tissue engineering
Source: Royal Society of Chemistry journal article supplement (doi:10.1039/d0tb00483a), 2020-01-01
Supplement: d0tb00483a1.pdf [file d0tb00483a1.pdf]

## **A decellularized scaffold derived from squid cranial cartilage for use in cartilage tissue engineering**

Thou Lim<sup>1\*</sup>, Qian Tang<sup>1\*</sup>, Zhen-Zhong Zhu<sup>1</sup>, Yong Feng<sup>1</sup>, Shi Zhan<sup>2</sup>, Xiao-Juan Wei<sup>2</sup>,  
Chang-Qing Zhang<sup>1</sup>

<sup>1</sup> Department of Orthopedic Surgery, Shanghai Jiao Tong University Affiliated Shanghai Sixth People's Hospital, 600 Yishan Road, Shanghai 200233, China.

<sup>2</sup> Institute of Microsurgery on Extremities, Shanghai Jiao Tong University Affiliated Shanghai Sixth People's Hospital, 600 Yishan Road, Shanghai 200233, China.

\*Contributed equally to this work.

### **Correspondence should be addressed to:**

Dr. Xiao-Juan Wei, PhD; E-mail: xjweish@126.com ; Institute of Microsurgery on Extremities, Shanghai Jiao Tong University Affiliated Sixth People's Hospital, 600 Yishan Road, Shanghai 200233, China. Tel: +86-189-30173684

Dr. Chang-Qing Zhang, MD, PhD; E-mail: zhangcq@sjtu.edu.cn ; Department of Orthopedic Surgery, Shanghai Jiao Tong University Affiliated Sixth People's Hospital, 600 Yishan Road, Shanghai 200233, China. Tel: +86-130-03104089

**Figure S1.**

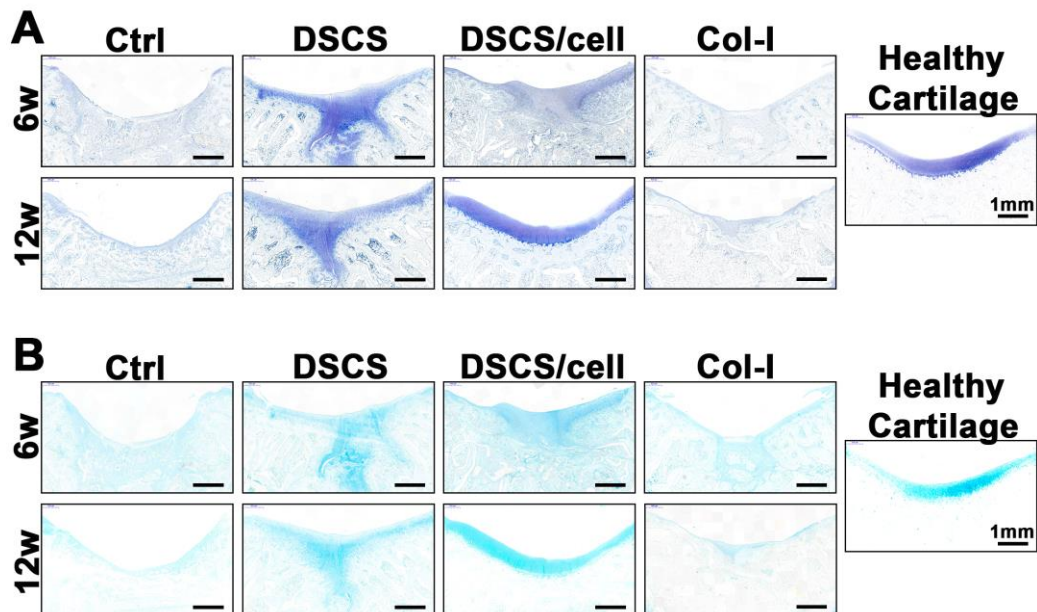

**Figure S1.** Microscopic evaluation of cartilage defect repair (A) Toluidine Blue staining of cartilage defect repair at 6 and 12 w (B) Alcian Blue staining of cartilage defect repair at 6 and 12 w. Scale bar = 1 mm

**Figure S2.**

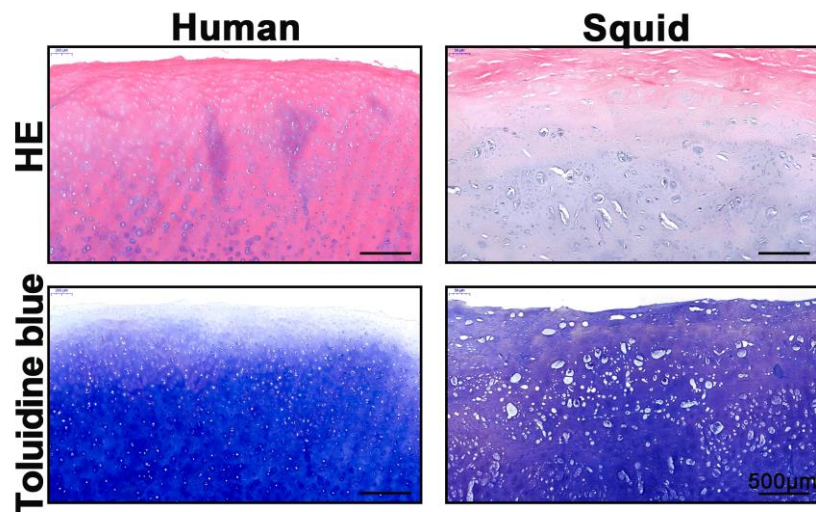

**Figure S2.** Comparison of microstructure between fresh human cartilage versus fresh squid cartilage by H&E and Toluidine Blue stainings

This study was performed in compliance with the Declaration of Helsinki. The cartilage tissue was obtained from cartilage's wreckage during costal cartilage transplantation surgery in our department. Written informed consent was obtained from each donor. Study approval was granted by the Ethics Committee of the Shanghai Jiao Tong University Affiliated Sixth People's Hospital.
